# Supplementary material for: Flexible dye-sensitized solar cells containing multiple dyes in discrete layers
Source: Royal Society of Chemistry journal article supplement (doi:10.1039/c1ee01269j), 2011-01-01
Supplement: c1ee01269j.pdf [file c1ee01269j.pdf]

# Flexible dye-sensitized solar cells containing multiple dyes in discrete layers

Fuzhi Huang,<sup>a</sup> Dehong Chen,<sup>b</sup> Lu Cao,<sup>b</sup> Rachel A. Caruso<sup>\*b,c</sup> and Yi-Bing Cheng<sup>\*a</sup>

<sup>a</sup> Department of Materials Engineering, Monash University,

Melbourne, Victoria, 3800, Australia. Fax: 613 9905 4940 ; Tel: 613 9905 4930; E-mail: yibing.cheng@monash.edu

<sup>b</sup> PFPC, School of Chemistry, The University of Melbourne, Melbourne, Victoria, 3010, Australia. Fax: 613 9347 5180 ; Tel: 613 8344 7146; Email: rcaruso@unimelb.edu.au

<sup>c</sup> CSIRO Materials Science and Engineering, Private Bag 33, Clayton South, Victoria, 3169, Australia.

## DSC assembly and characterization

1. Cell fabrication: The dye sensitized working electrode on the ITO-PEN substrate was sandwiched with a Pt-sputtered ITO-PEN counter electrode. A 25  $\mu\text{m}$  thick surllyn (DuPont) was used as a spacer. The electrolyte, comprising of 0.4 M LiI, 0.4 M tetrabutylammonium iodide, 0.04 M  $\text{I}_2$ , 0.3 M *N*-methylbenzimidazole in a mixture of acetonitrile and 3-methoxypropionitrile (1:1, by volume) was injected into the devices. Then the cell was put into a jig with screws to tighten the device avoiding leakage of electrolyte during testing.

2. Characterization: I-V curves of the DSCs were obtained by using a Keithley 2400 Source Meter under illumination of simulated sunlight ( $100 \text{ mW/cm}^2$ ) provided by an Oriel solar simulator with an AM1.5 filter. A black metal with a circle aperture (4.5 mm in diameter) was placed on top of the device during photovoltaic testing. IPCE spectra were recorded on a Keithley 2400 Source Meter under the irradiation of a 300 W xenon lamp with an Oriel Cornerstone<sup>TM</sup> 260 1/4 m monochromator. The electrochemical impedance spectroscopy (EIS) measurements of the DSCs were recorded on a potentiostat (BioLogic VSP) with a frequency range of 0.05 –  $10^5$  Hz. The magnitude of the alternative signal was 10 mV. The EIS measurements were carried out under AM 1.5 solar radiation with a voltage bias of  $V_{oc}$ .

## Stamping Process

In the stamping process, there are three different adhesions: TiO<sub>2</sub> layer with ITO, TiO<sub>2</sub> layer with TiO<sub>2</sub> layer and TiO<sub>2</sub> layer with PEN. The TiO<sub>2</sub> layer with TiO<sub>2</sub> layer has the strongest adhesion, the high pressure applied during stamping would induce strong connections between the TiO<sub>2</sub> particles to facilitate electron transportation. Similarly, the TiO<sub>2</sub> nanoparticles would also form strong connections with the ITO particles. However, the TiO<sub>2</sub> nanoparticles cannot form an effective connection with the PEN. Therefore, the TiO<sub>2</sub> layer on the PEN was transferred to the TiO<sub>2</sub> layer on the ITO. The different adhesion properties may be due to the different surface free energy. The TiO<sub>2</sub> and ITO layers are composed of metal oxide nanoparticles, which have a high surface free energy, ~89 dynes/cm. While the PEN substrate has a relatively low surface free energy (~44 dynes/cm. *Note: the well known non-stick polytetrafluoroethylene (TEFLON) coating has a surface free energy of ~20 dynes/cm*). The higher surface free energy would help the adhesion.

The surface roughness also attributes to the different adhesion properties. The surface of the ITO layer (as shown in Fig. S1) and TiO<sub>2</sub> layer are much rougher than that of PEN, due to their nanoparticulate structure. The increased roughness means a higher contact surface area and a larger number of connections at the interface. Actually, other plastic materials, such as a plastic bag (PE/PA, with a surface free energy ~44 dynes/cm), can also be used to create a weak bonding with the TiO<sub>2</sub> film for the stamping process.

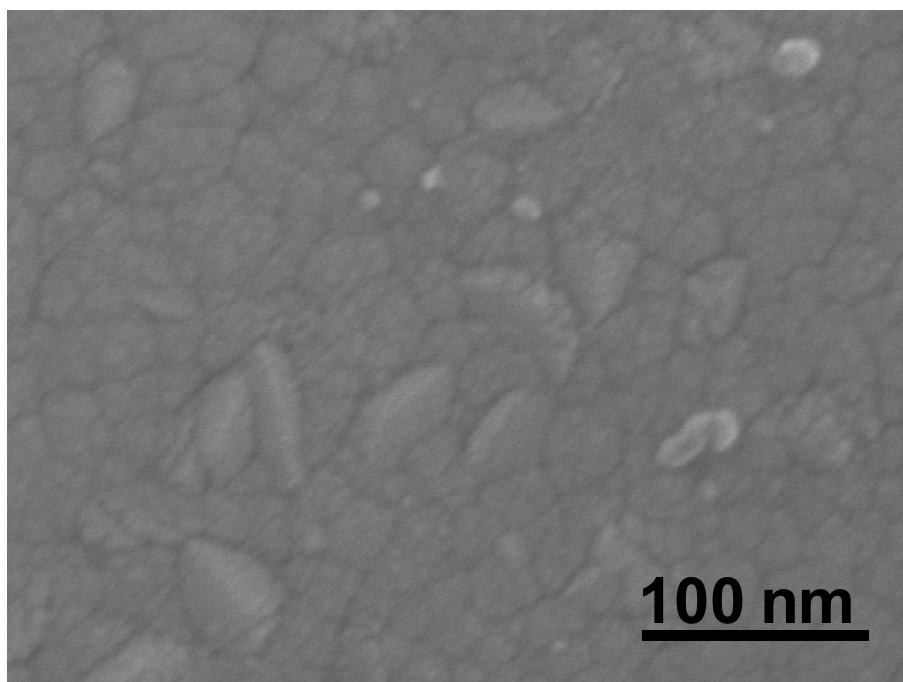

**Figure S1** SEM image of the surface of ITO-PEN substrate.

**Table S1.** The photovoltaic characteristics of two DSC cells. The NN-Stamping sample contained an electrode composed of two layers of N719 sensitized TiO<sub>2</sub> formed via the stamping process. The NN sample contained a single layered N719 sensitized TiO<sub>2</sub> film of similar total thickness to that in the NN-Stamping sample.

| Sample name | V <sub>oc</sub> (mV) | J <sub>sc</sub> (mA/cm <sup>2</sup> ) | Fill Factor | PCE (%) |
|-------------|----------------------|---------------------------------------|-------------|---------|
| NN-Stamping | 748                  | 10.55                                 | 0.68        | 5.36    |
| NN          | 757                  | 11.17                                 | 0.65        | 5.44    |

**Table S2.** Dye loading for the electrodes of N719, GD3, NG-Stamping, and NG-Cocktail.

|             | N719 ( x 10 <sup>-8</sup> mol/cm <sup>2</sup> ) | GD3 ( x 10 <sup>-8</sup> mol/cm <sup>2</sup> ) |
|-------------|-------------------------------------------------|------------------------------------------------|
| N719        | 3.65                                            | -                                              |
| GD3         | -                                               | 7.03                                           |
| NG-Stamping | 3.57                                            | 6.23                                           |
| NG-Cocktail | 4.69                                            | 3.91                                           |

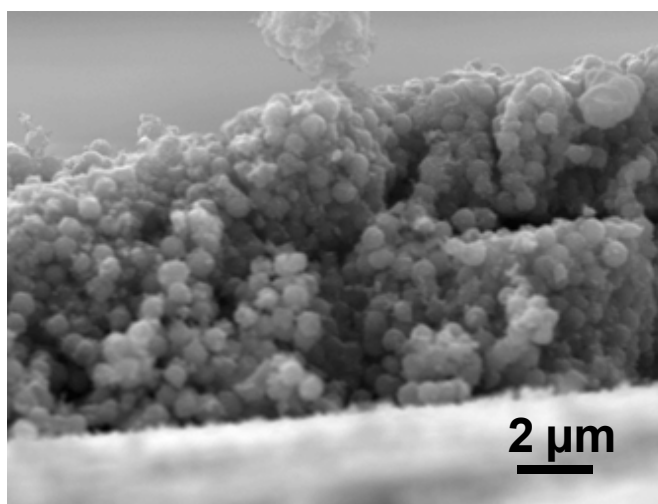

**Figure S2** Cross-section SEM image of a stamped two-layer electrode.

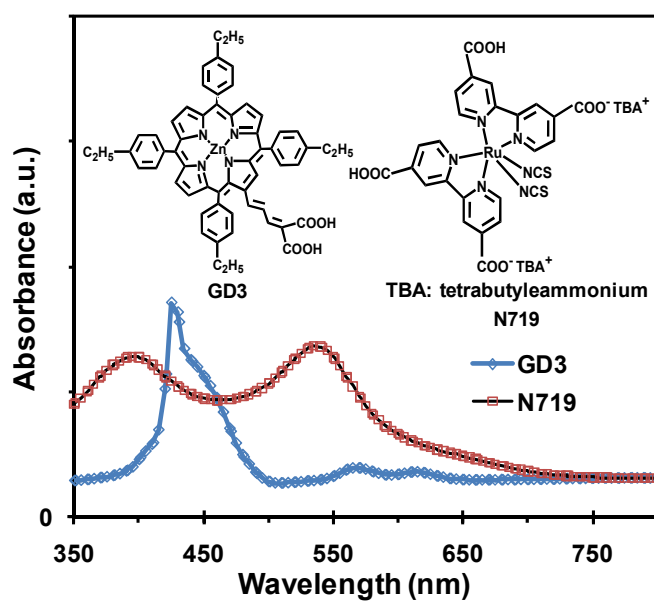

**Figure S3** UV-Vis absorption spectra of GD3 and N719 dye solutions.

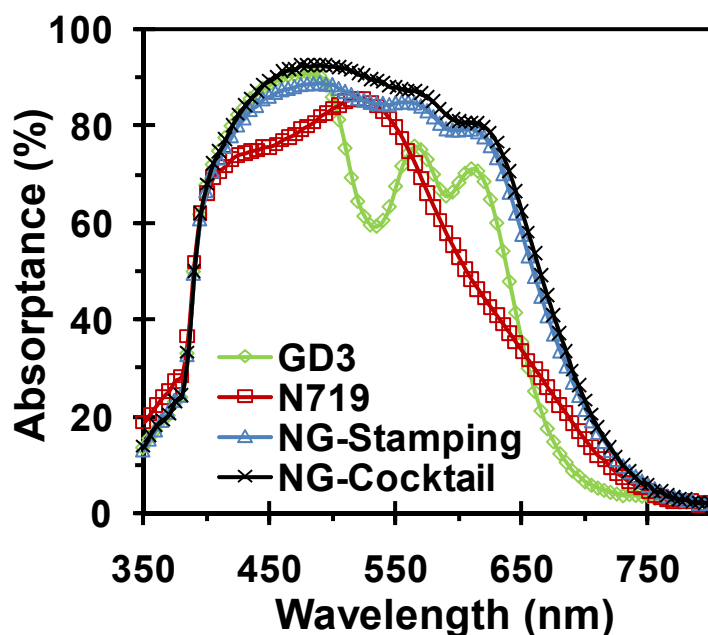

**Figure S4** UV-Vis absorption spectra of the dye sensitized GD3, N719, NG-Stamping, and NG-Cocktail electrodes.

Note: The spectra were calculated from the following equation:

$$A(\lambda) = 1 - R(\lambda) - T(\lambda) \quad (S1)$$

Here  $\lambda$  is the wavelength,  $A(\lambda)$  is the absorbance (fraction of light absorbed by a sample at a specified wavelength),  $R(\lambda)$  is the diffuse reflectance (the fraction of incident radiation scattered and reflected by a surface at a specified wavelength),  $T(\lambda)$  is the diffuse transmittance (the fraction of incident light at a specified wavelength that passes through a sample). First, the diffuse reflectance and transmittance spectra of the films were measured on a Cary 5000 UV-Vis-NIR spectrophotometer via integrating sphere (Internal DRA-2500). Then the absorption spectra were calculated from equation S1. Finally, the absorption spectra were corrected by subtraction of the absorbance of the ITO-PEN substrate.

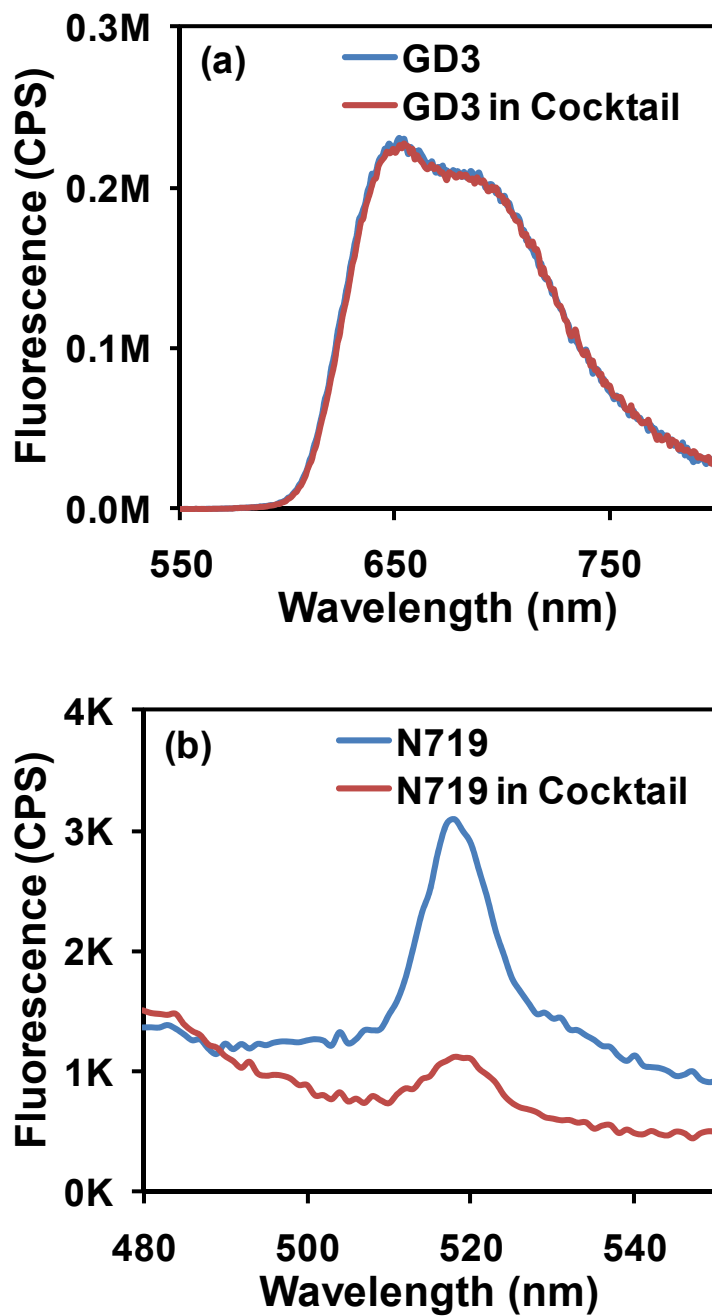

Figure S5 The fluorescence spectra of (a) GD3 and (b) N719 in solution and the mixed cocktail solution with the same individual dye concentrations.

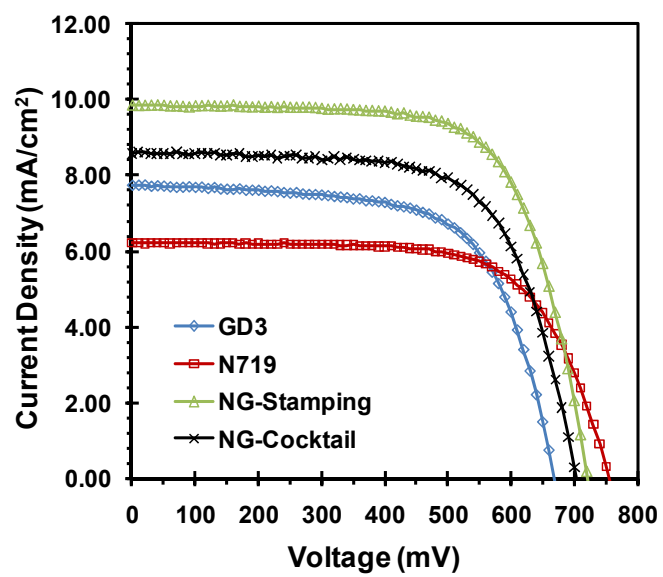

**Figure S6** I-V curves of the DSCs made from GD3, N719, NG-Stamping, and NG-Cocktail electrodes.
